# Supplementary material
Source: PubMed Central journal article supplement (PMC8813006)

Figure S1

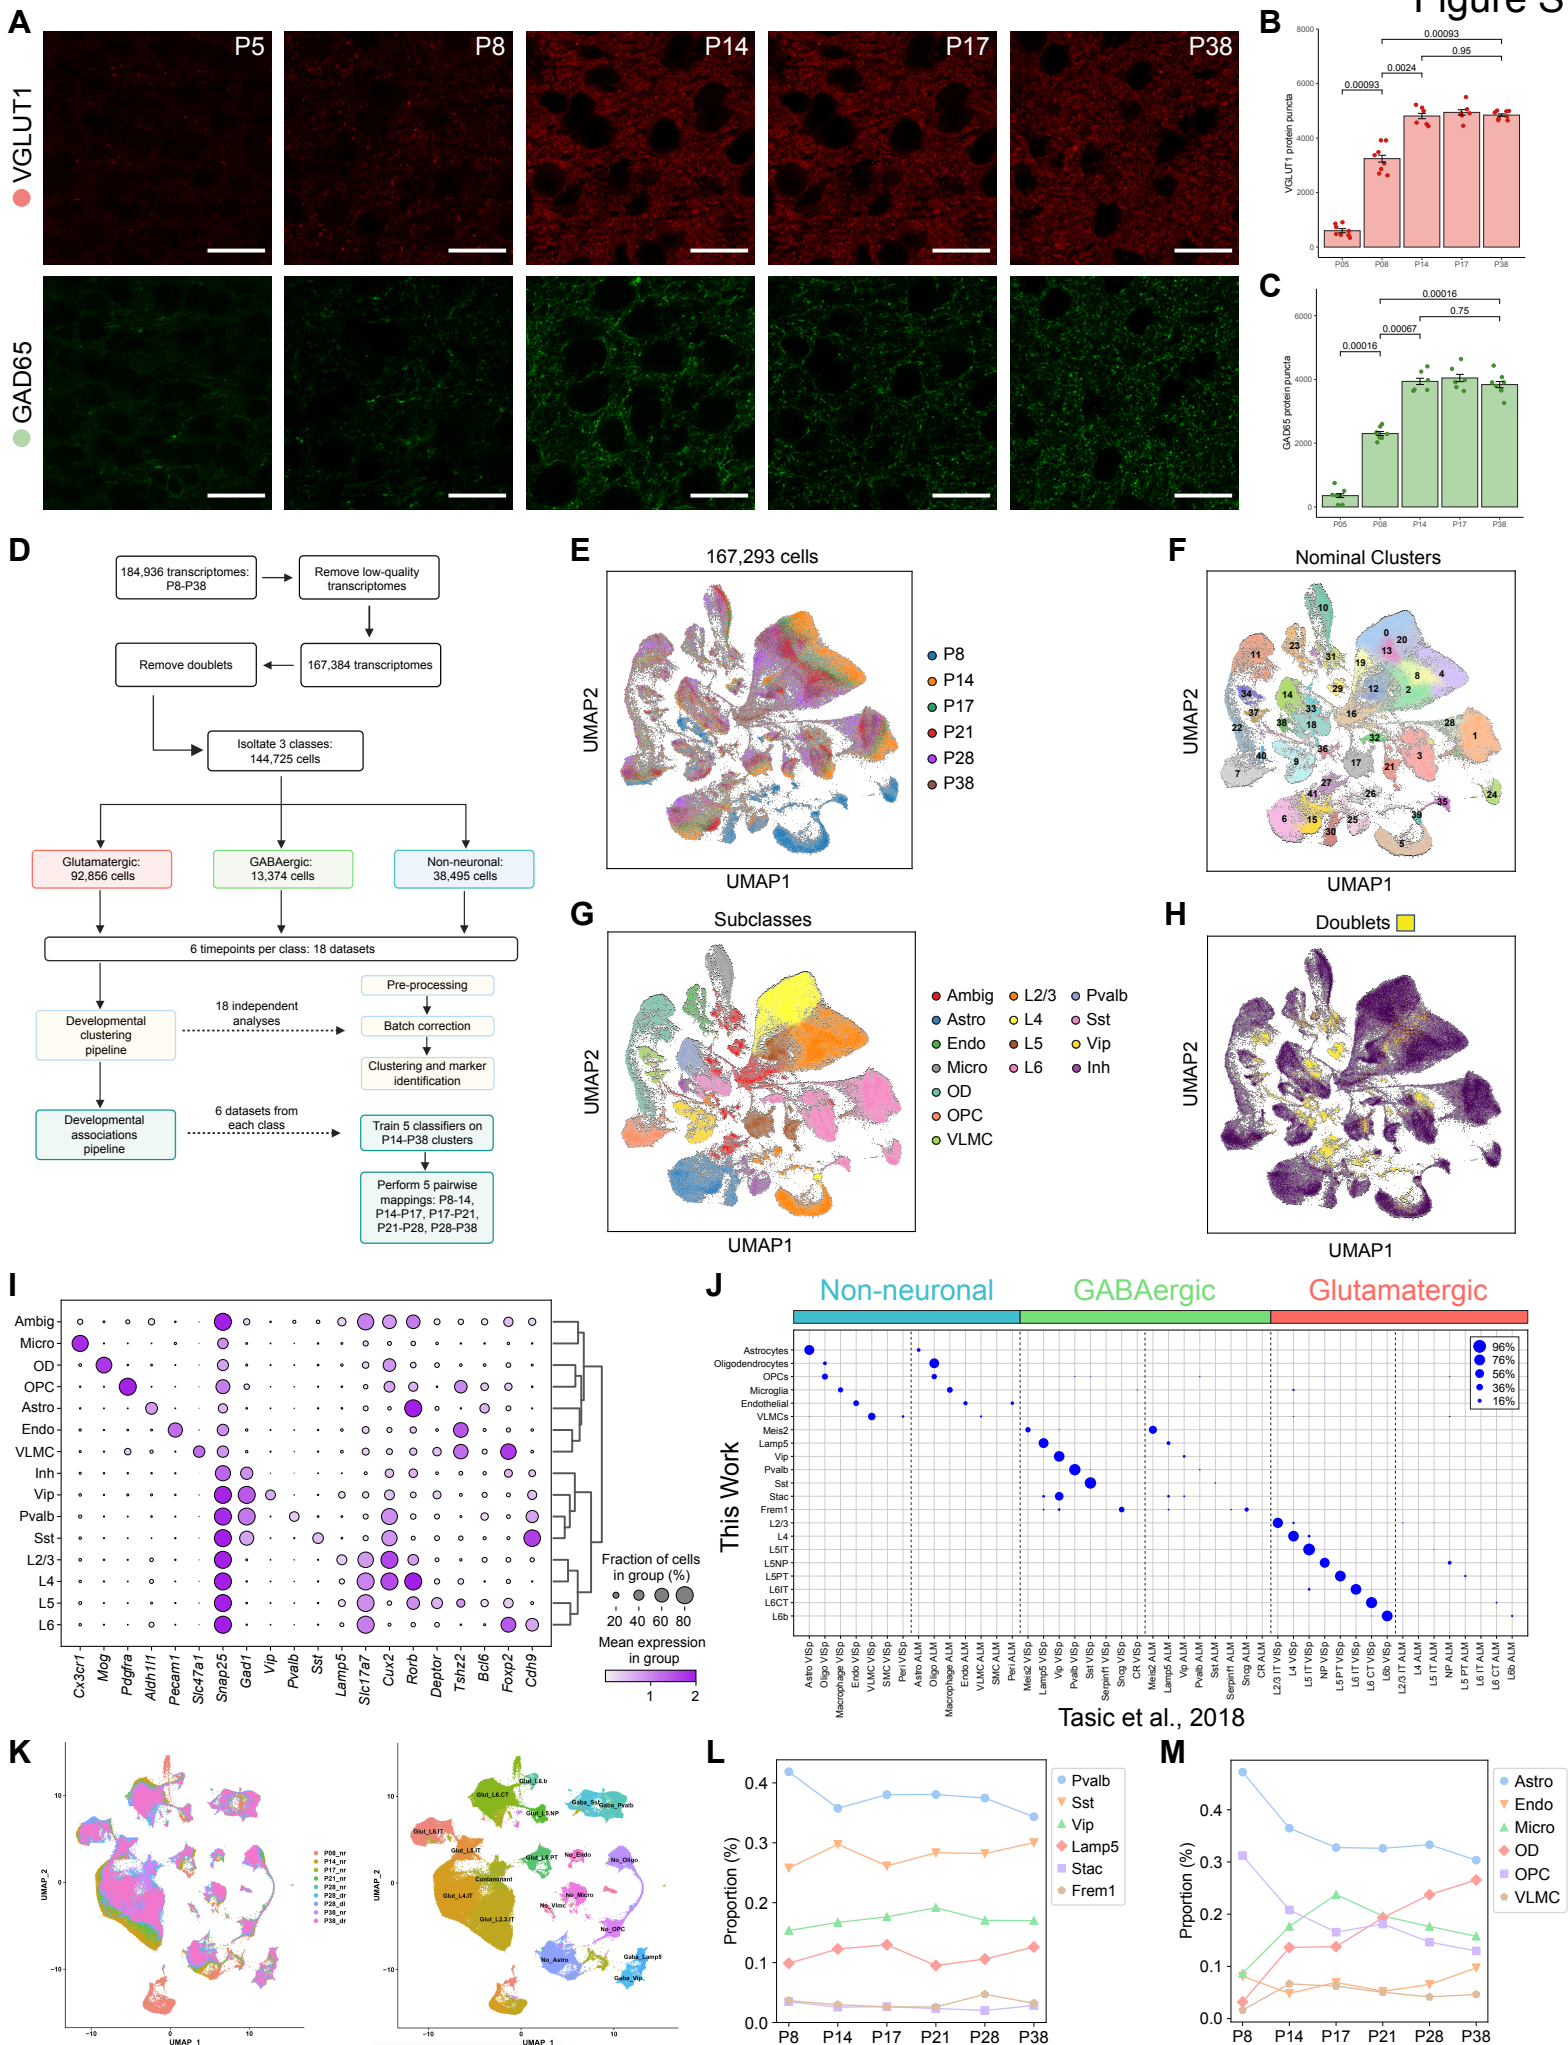

Supplement: NIHMS1770258-supplement-1.pdf [file NIHMS1770258-supplement-1.pdf]

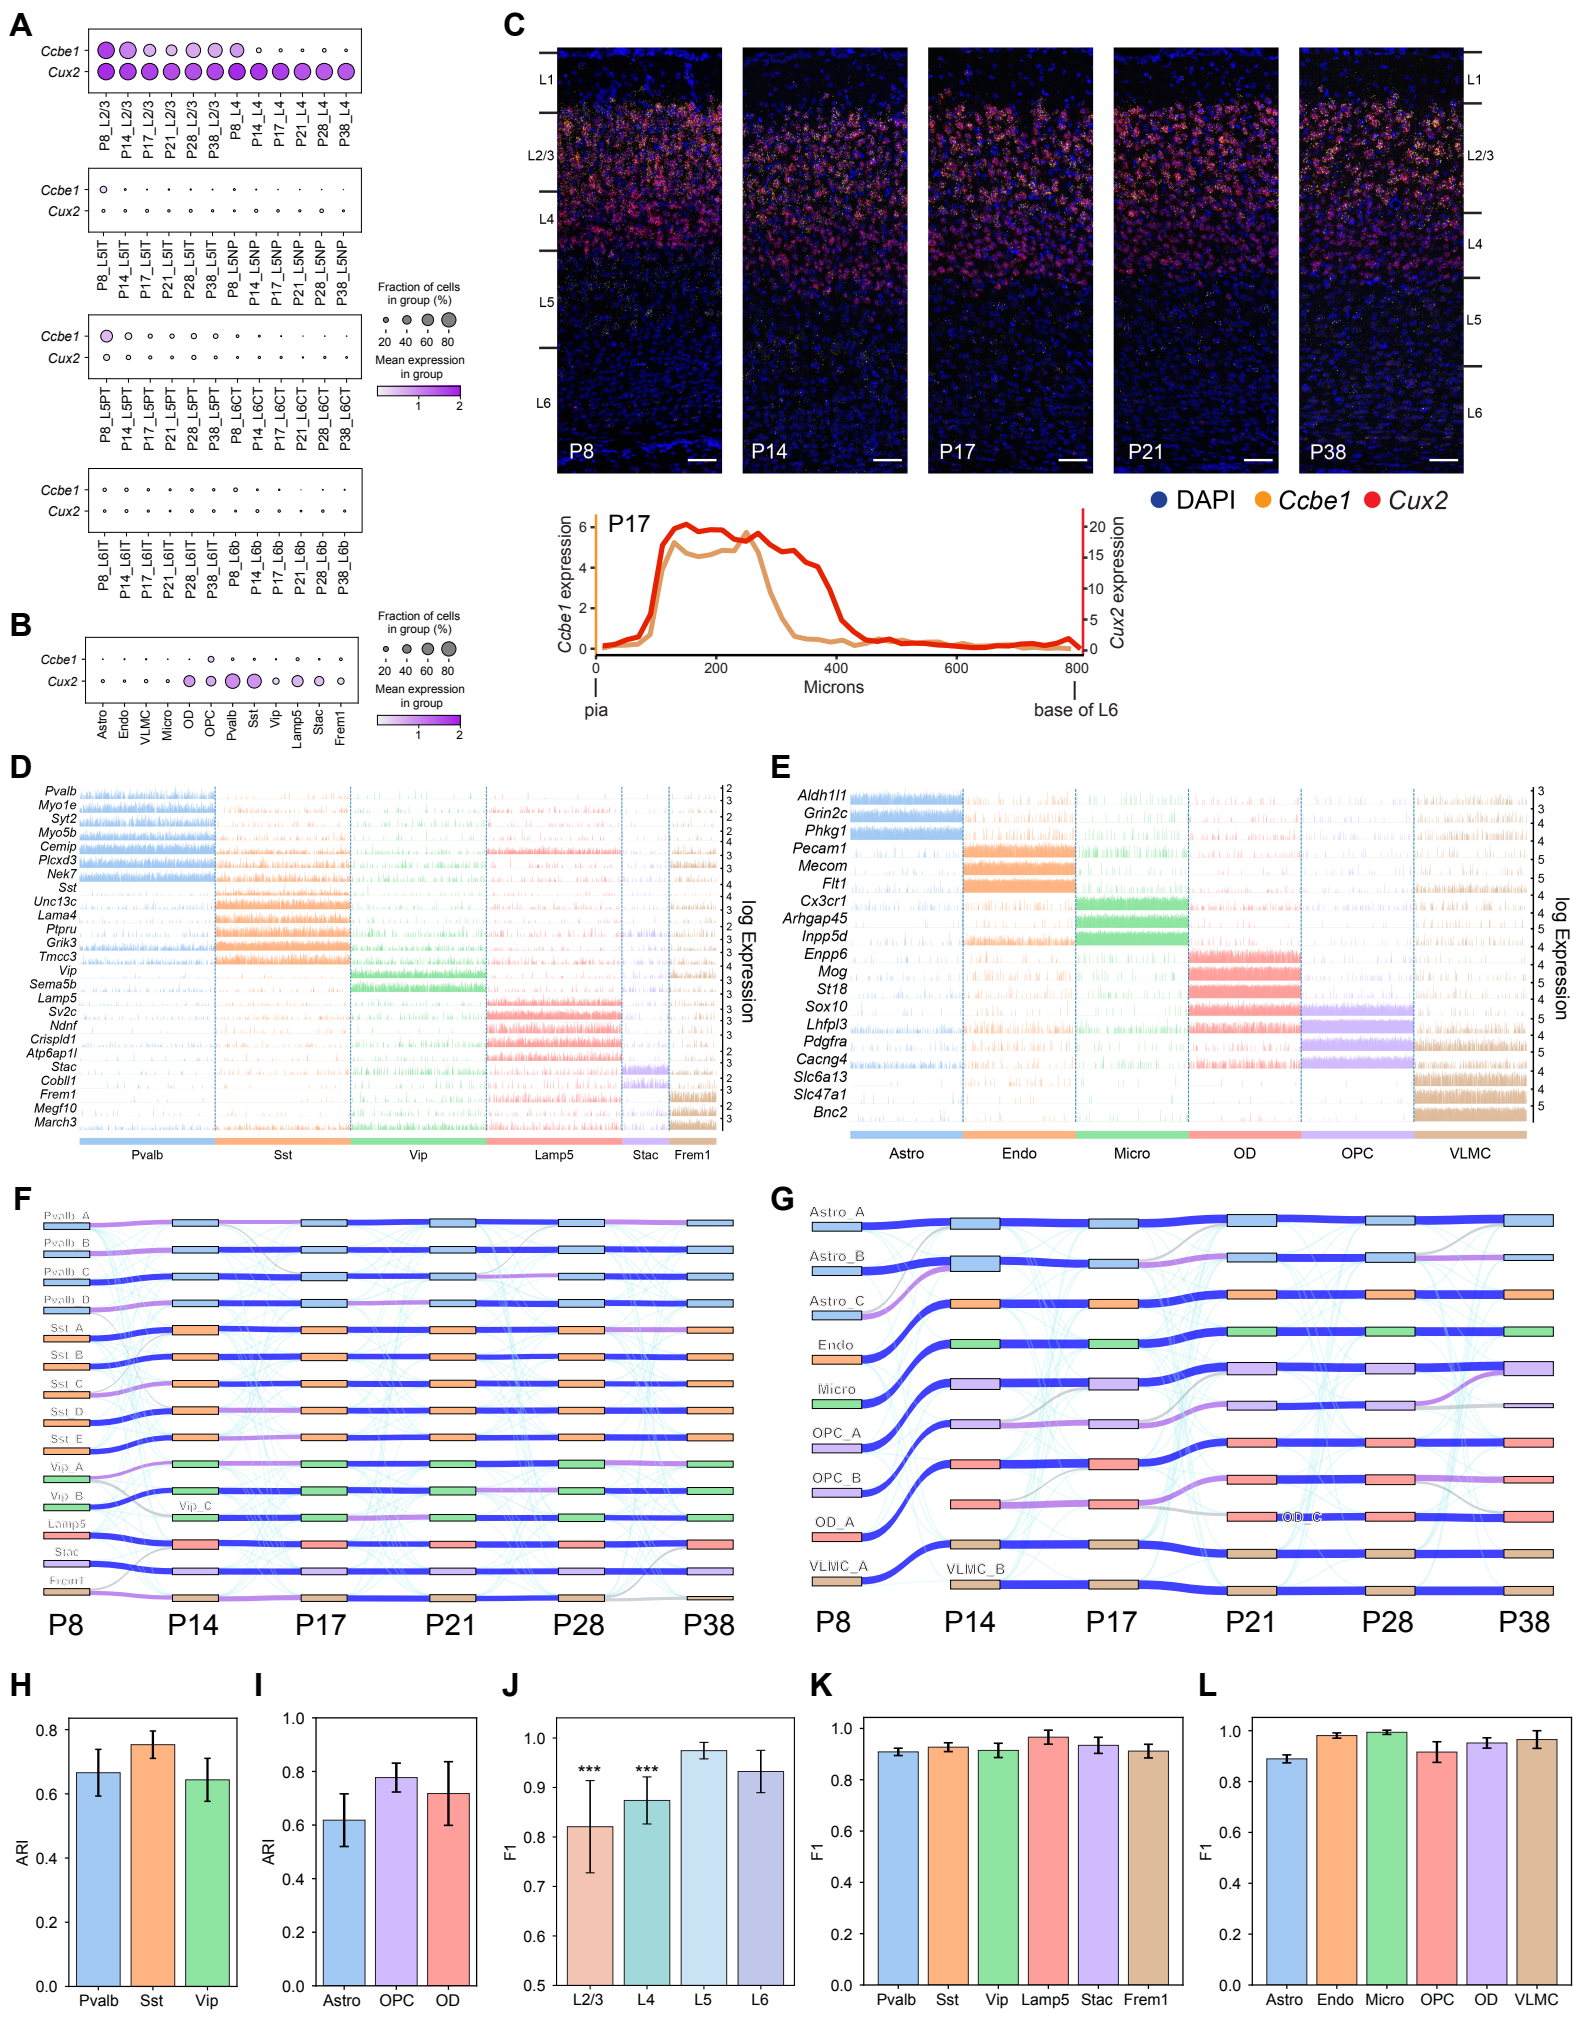

Supplement: NIHMS1770258-supplement-2.pdf [file NIHMS1770258-supplement-2.pdf]

**A**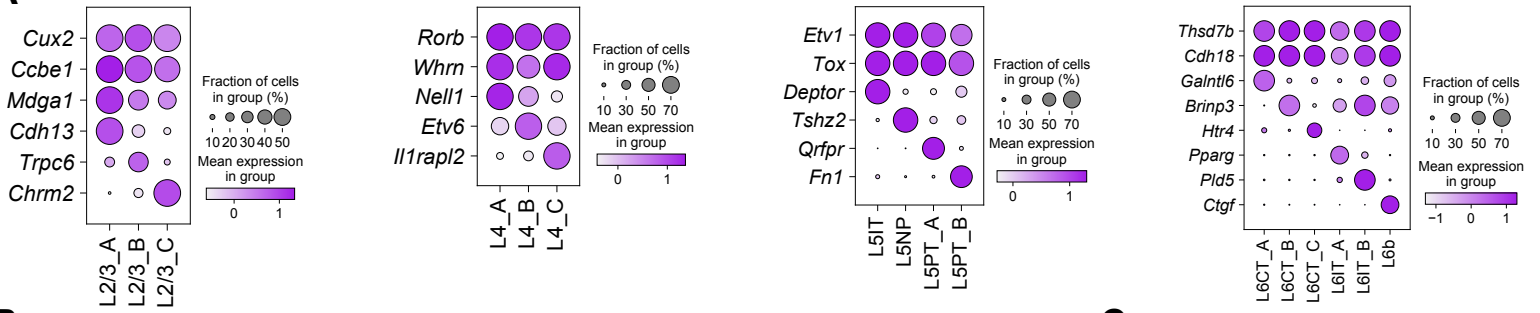**B**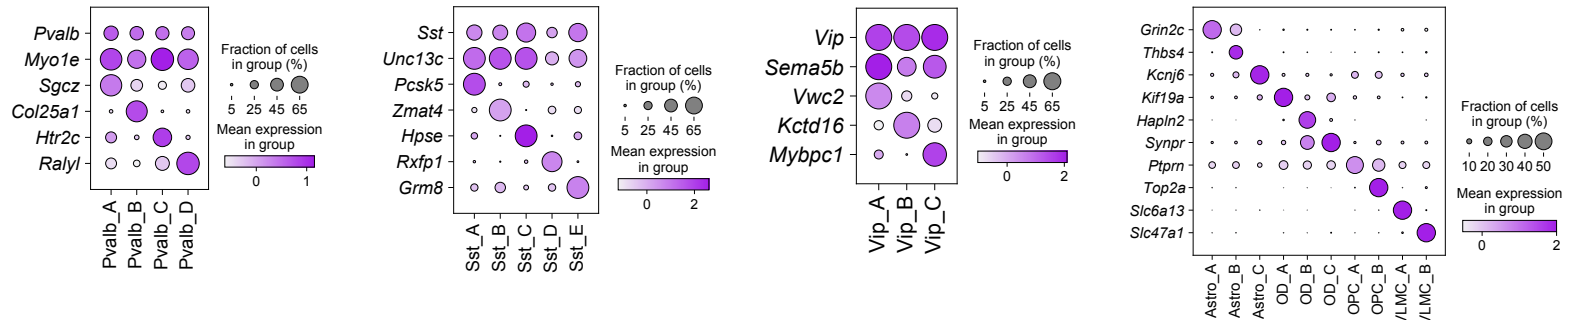**D**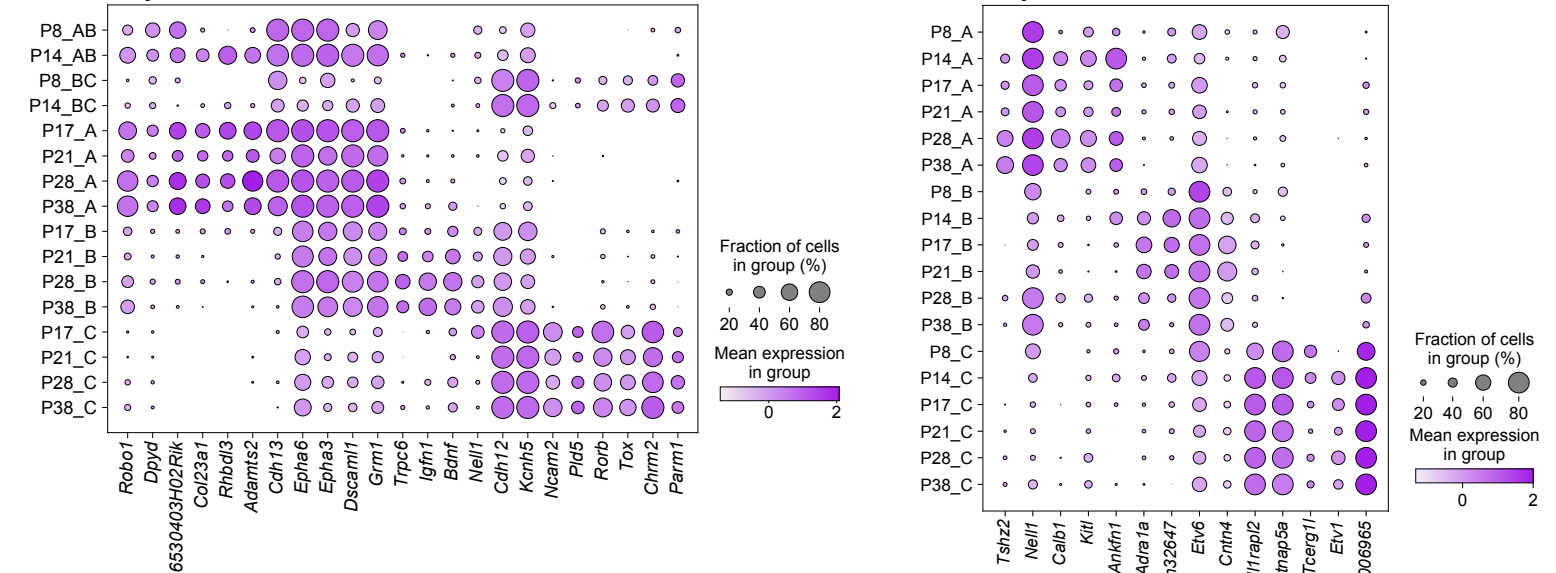**E**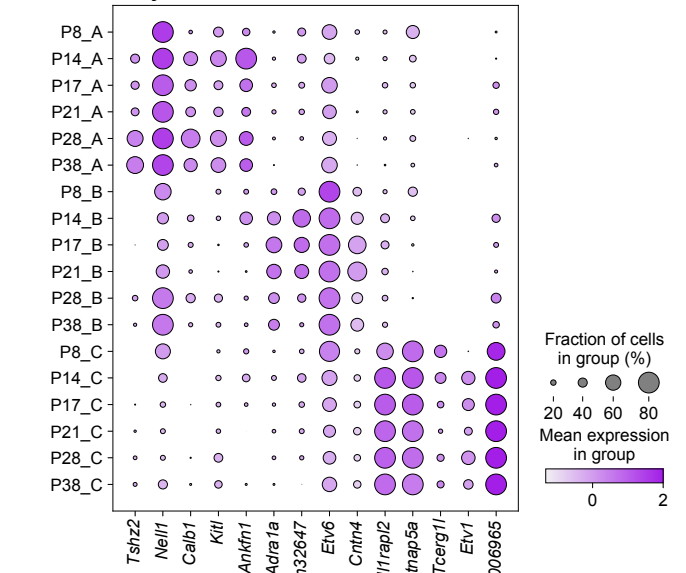**F**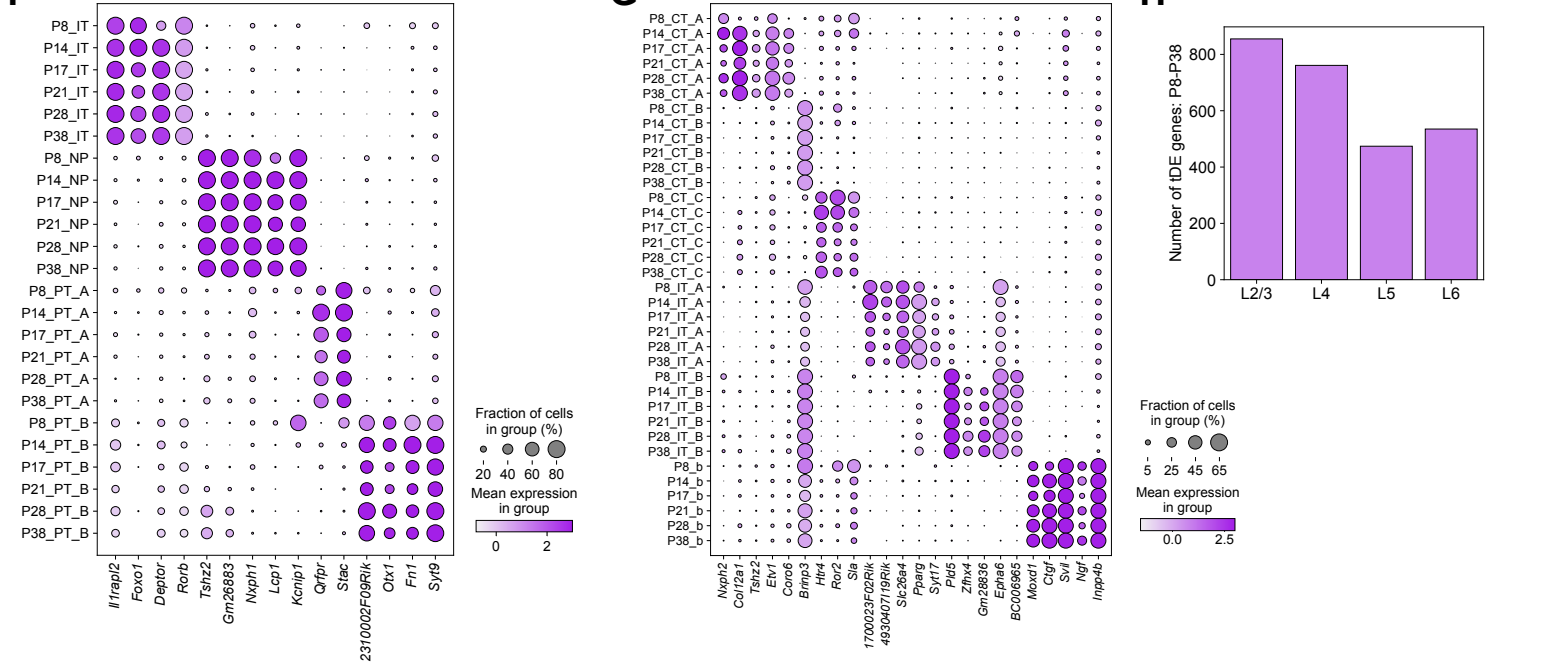**G**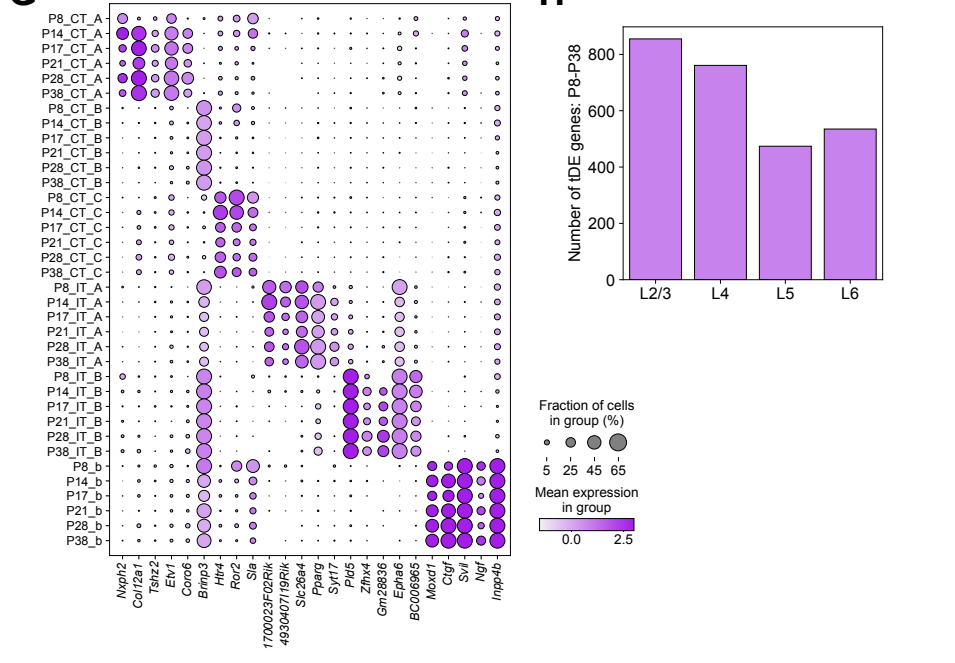**H**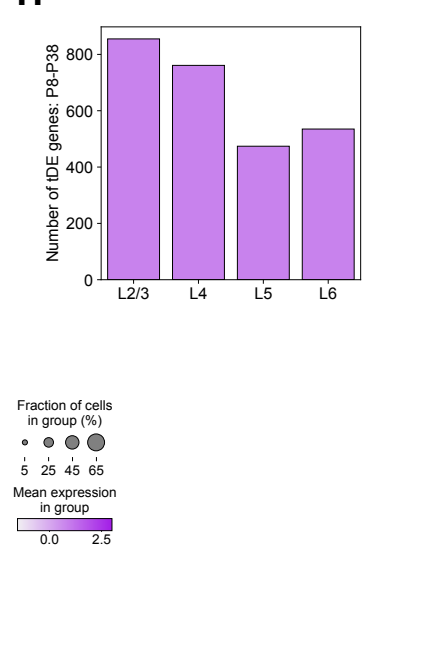

Supplement: NIHMS1770258-supplement-3.pdf [file NIHMS1770258-supplement-3.pdf]

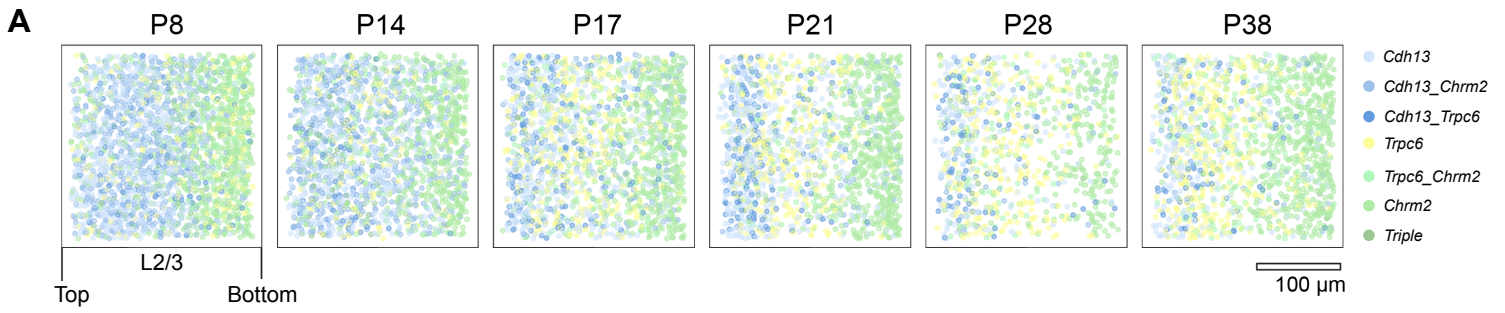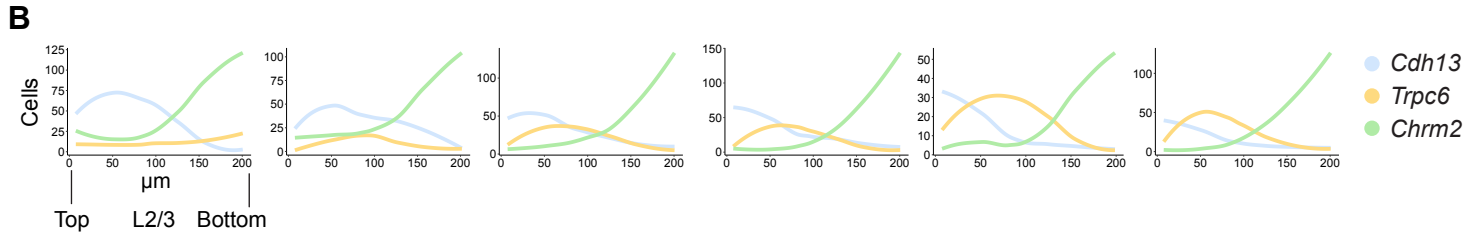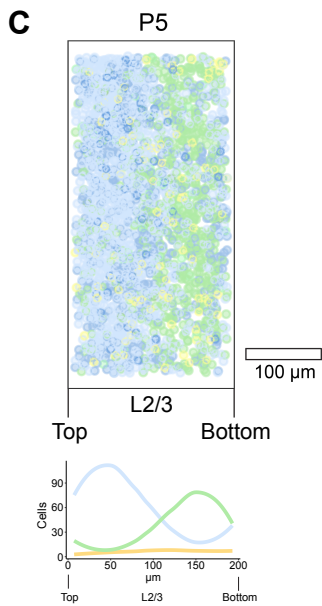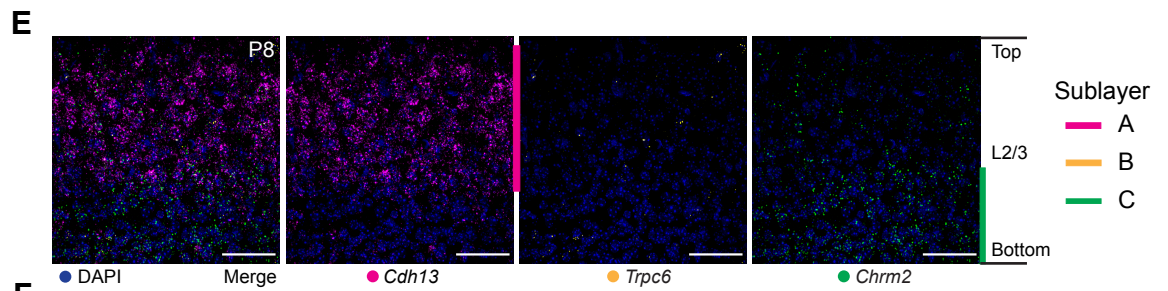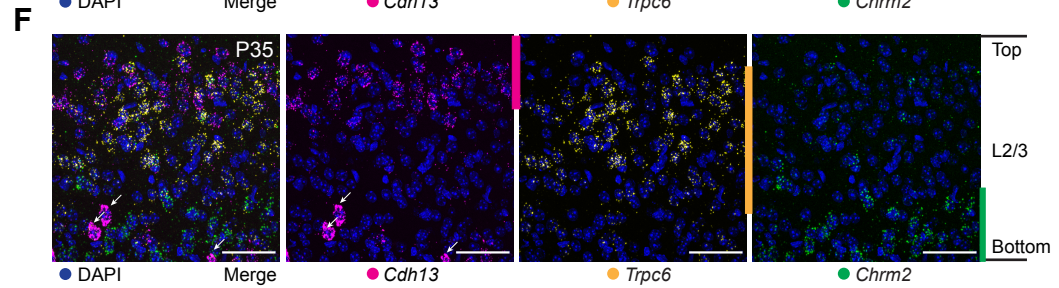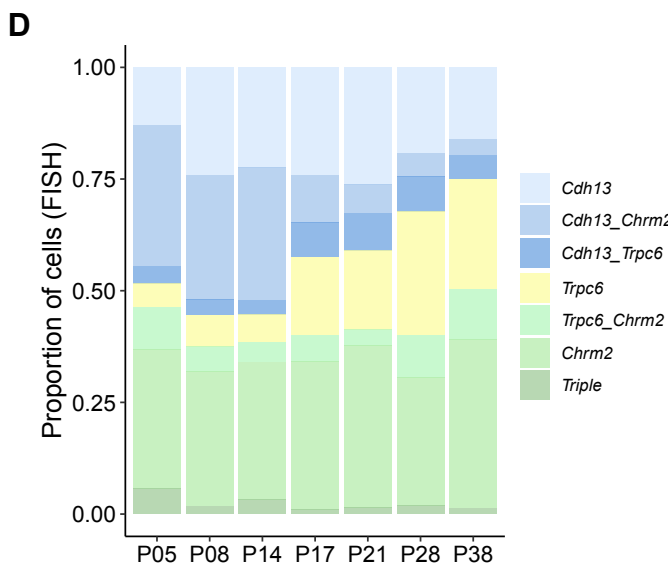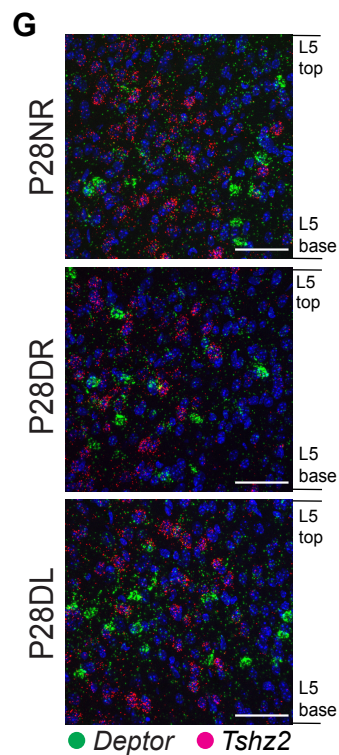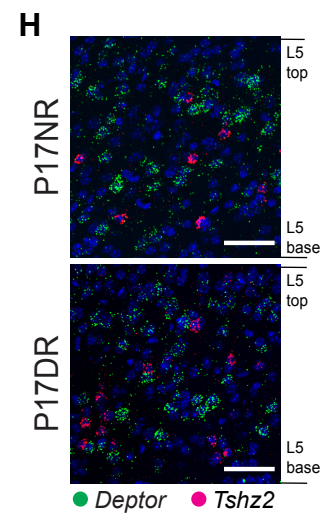

Supplement: NIHMS1770258-supplement-4.pdf [file NIHMS1770258-supplement-4.pdf]

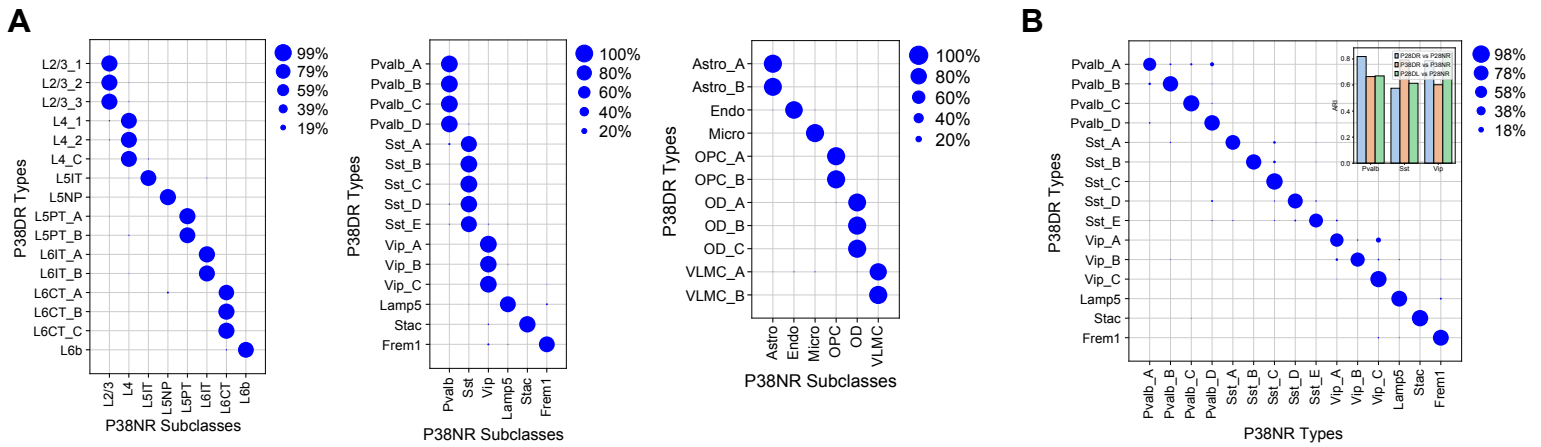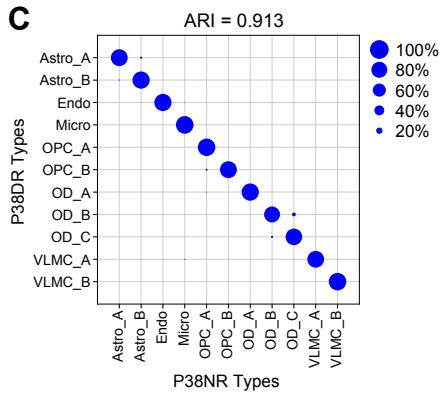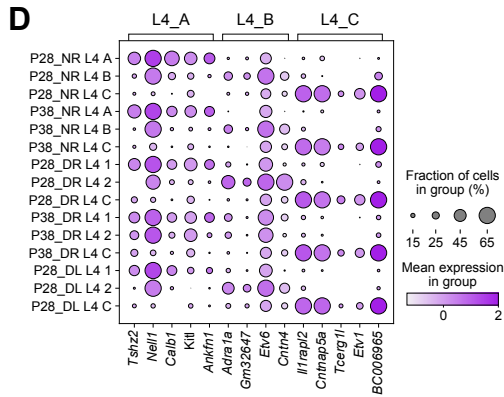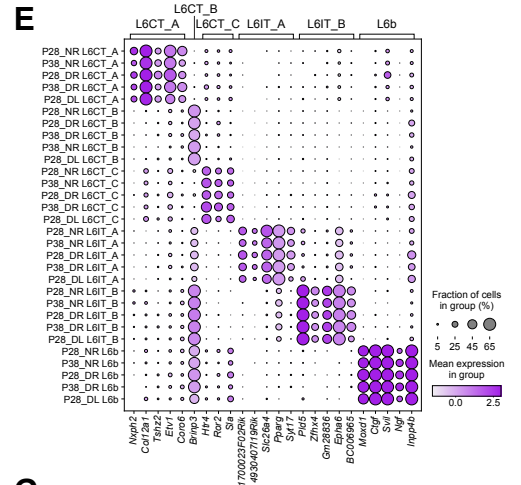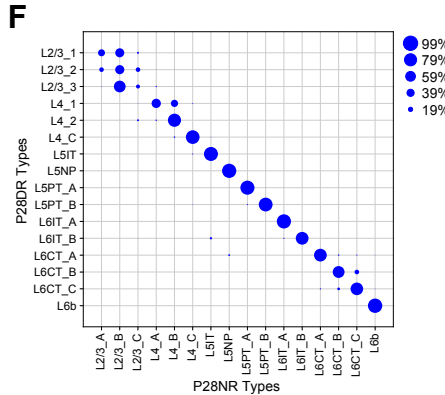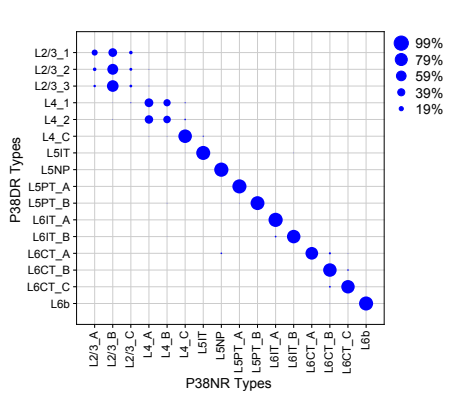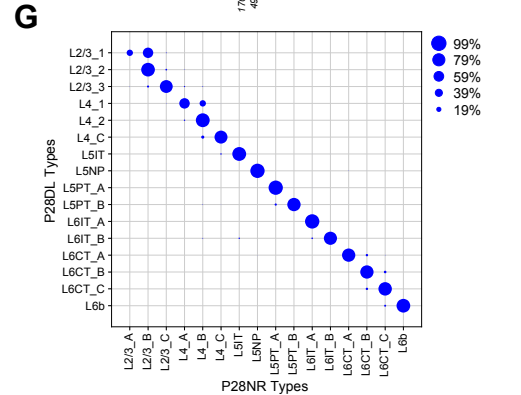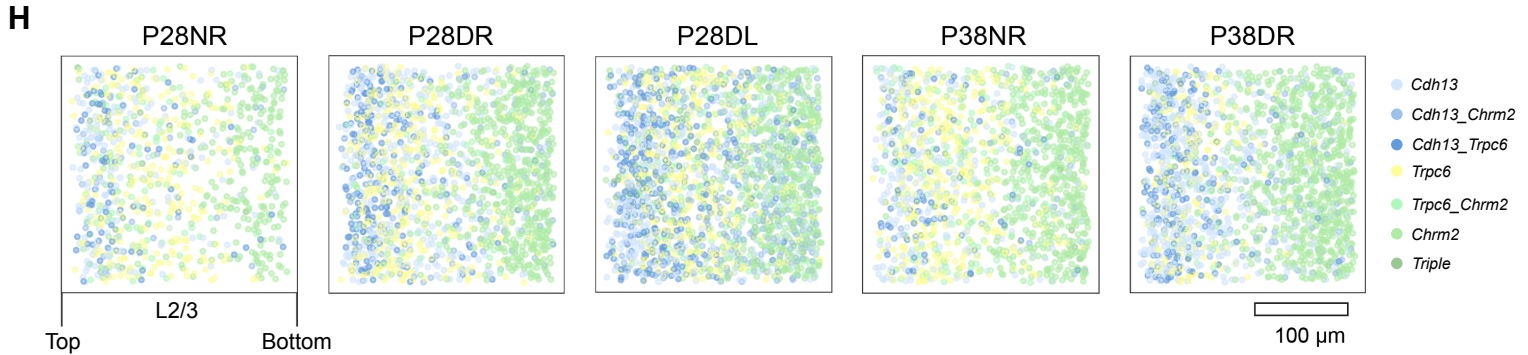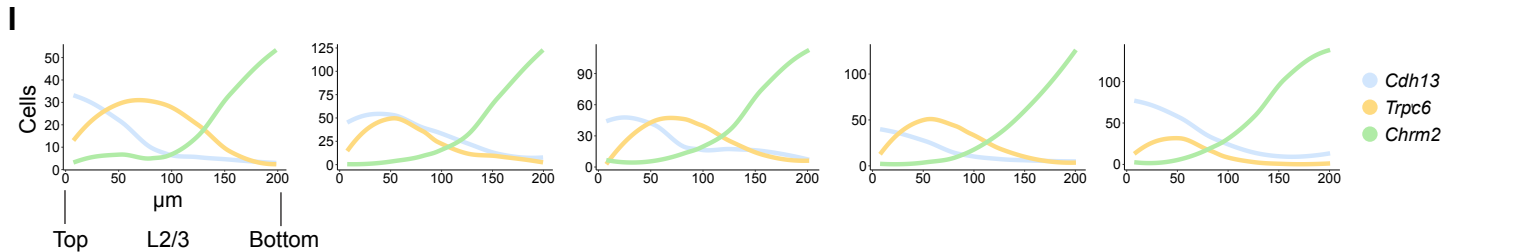

Supplement: NIHMS1770258-supplement-5.pdf [file NIHMS1770258-supplement-5.pdf]

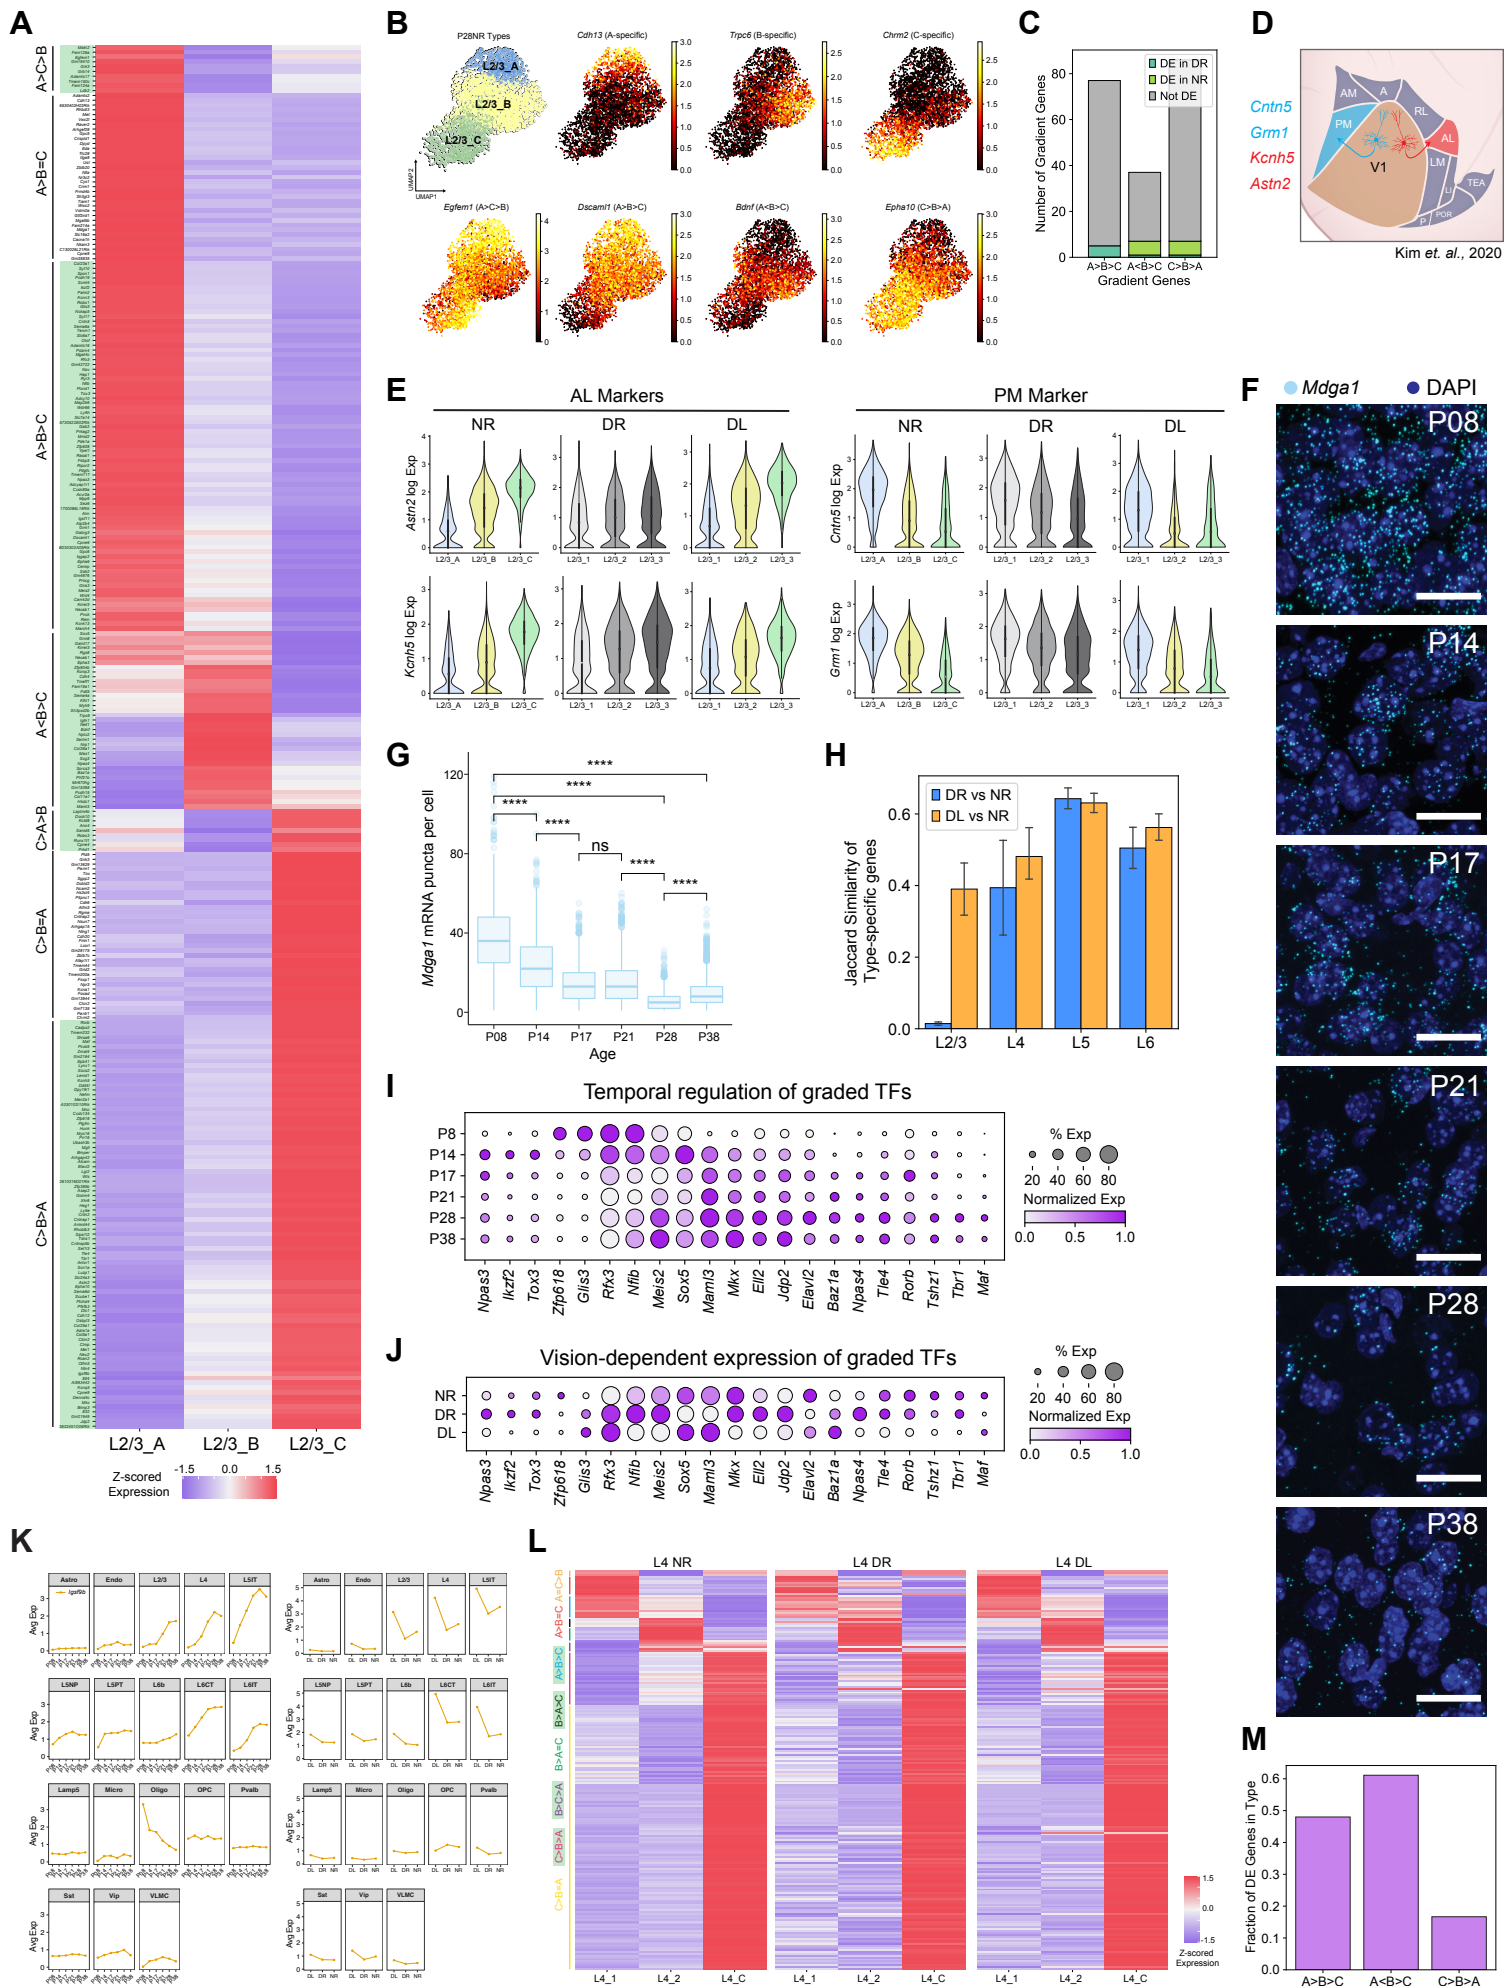

Supplement: NIHMS1770258-supplement-6.pdf [file NIHMS1770258-supplement-6.pdf]
